# Supplementary material
Source: Springer Nature journal article supplement (https://www.springermedizin.de/resource/supplementary/12970_2010_175_MOESM1_ESM.pdf/9594516)

**PRESCRIPTION DRUGS**

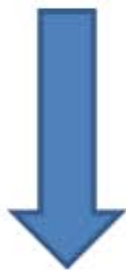

**PERFORMANCE  
ENHANCING  
DRUGS**

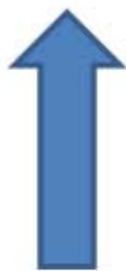

**SUPPLEMENTS**

**OTC DRUGS**

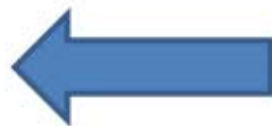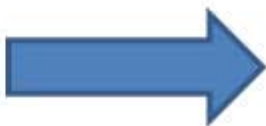

**ILLICIT DRUGS**

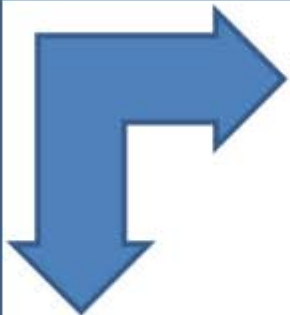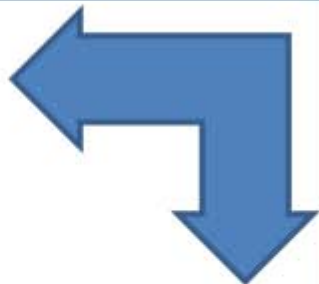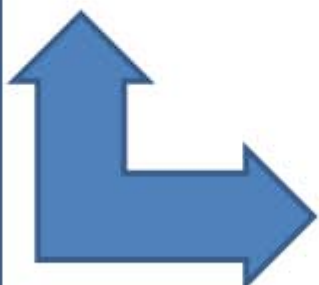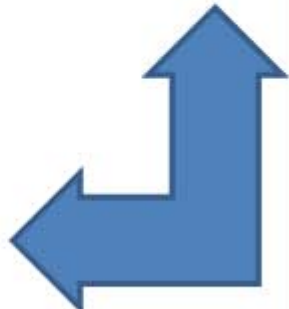

Supplement: MOESM1 [file 9594516]
